# Supplementary material for: Microwave ablation compared with hepatic resection for the treatment of hepatocellular carcinoma and liver metastases: a systematic review and meta-analysis
Source: PubMed Central journal article supplement (PMC6558848; doi:10.1186/s12957-019-1632-6), 2019-06-10

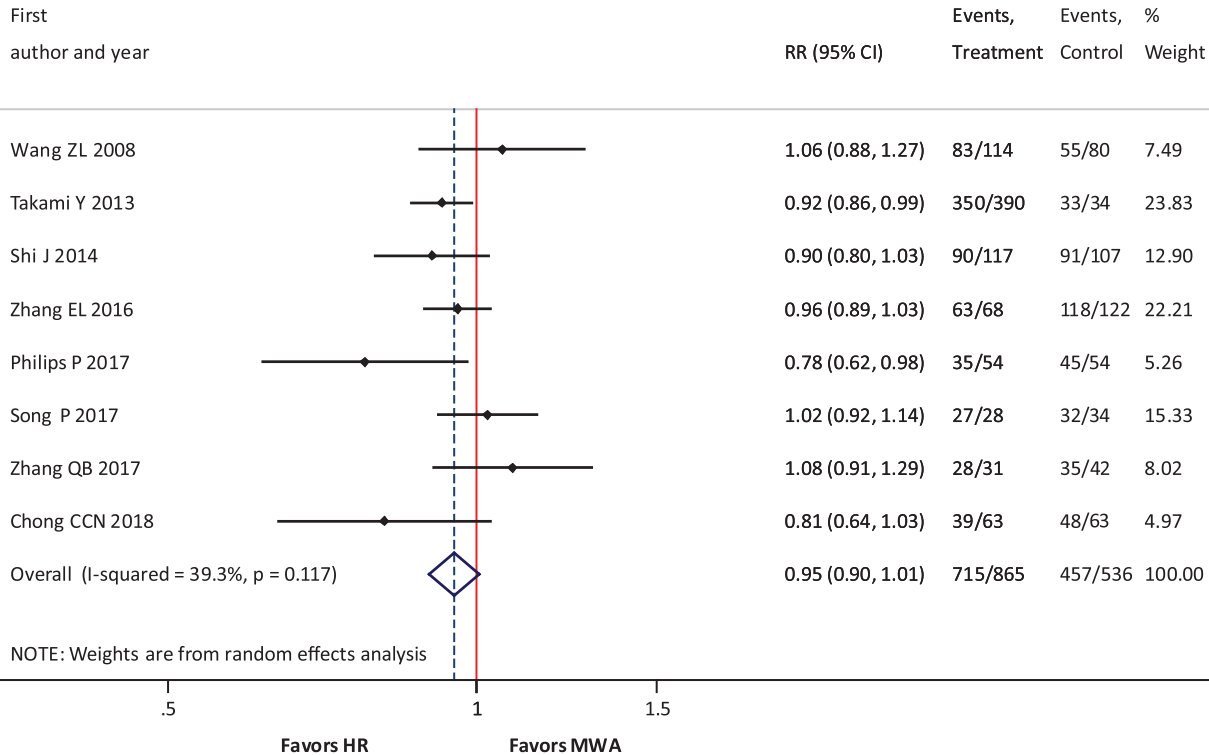

Supplement: 12957_2019_1632_MOESM13_ESM.pdf [file 12957_2019_1632_MOESM13_ESM.pdf]
