# Supplementary material for: Microwave ablation compared with hepatic resection for the treatment of hepatocellular carcinoma and liver metastases: a systematic review and meta-analysis
Source: PubMed Central journal article supplement (PMC6558848; doi:10.1186/s12957-019-1632-6), 2019-06-10
Supplement: 12957_2019_1632_MOESM17_ESM.pdf [file 12957_2019_1632_MOESM17_ESM.pdf]

First author and year

RR (95% CI)

Events, Treatment    Events, Control    % Weight

Li W 2017

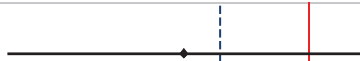

0.13 (0.01, 2.23)

0/60

13/220

10.68

Philips P 2017

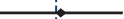

0.26 (0.10, 0.68)

5/108

15/84

89.32

Wang ZL 2008

(Excluded)

0/114

0/80

0.00

Ryu T 2017

(Excluded)

0/13

0/14

0.00

Overall (I-squared = 0.0%, p = 0.650)

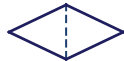

0.24 (0.10, 0.61)

5/295

28/398

100.00

NOTE: Weights are from random effects analysis

.1    .5    1    2    10

Favors MWA                      Favors HR
