# Supplementary material for: Microwave ablation compared with hepatic resection for the treatment of hepatocellular carcinoma and liver metastases: a systematic review and meta-analysis
Source: Springer Nature journal article supplement (doi:10.1186/s12957-019-1632-6), 2019-06-10

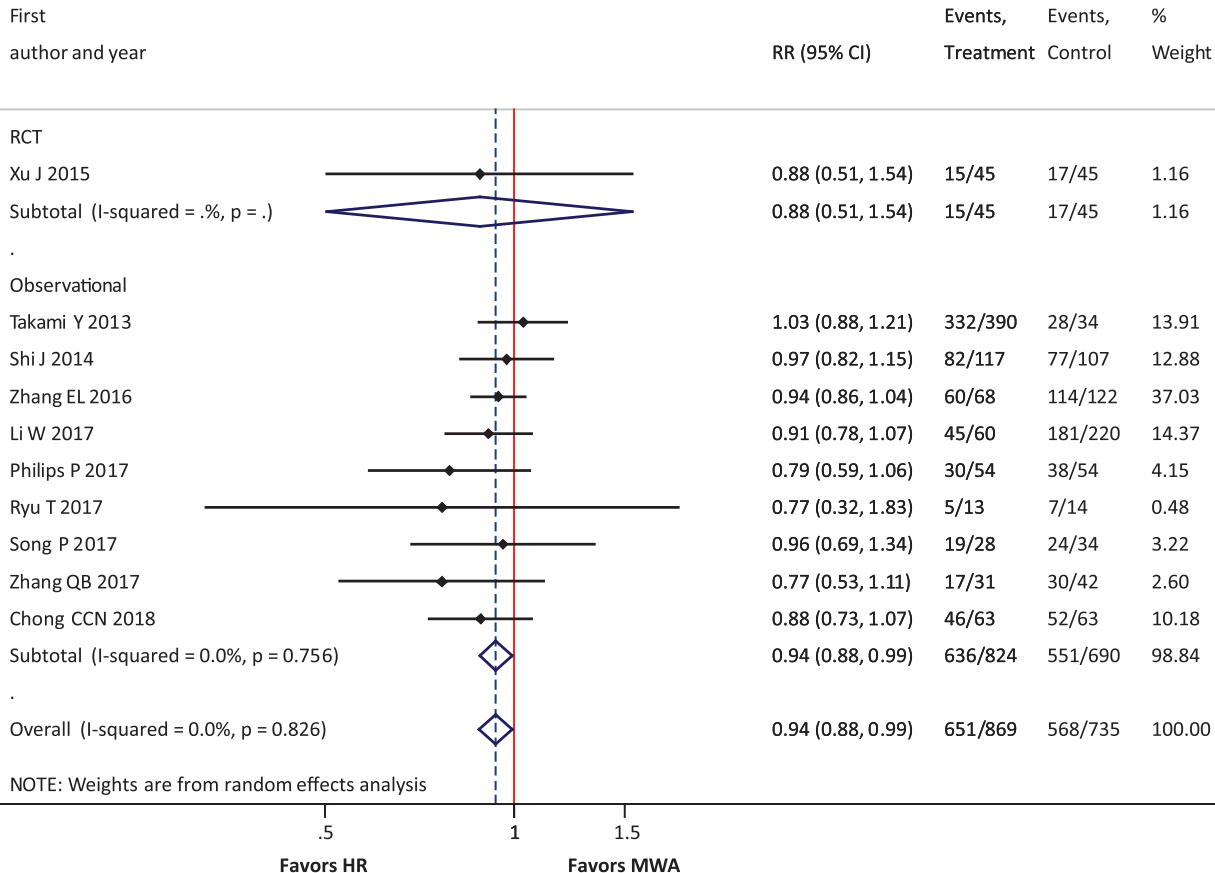

Supplement: MOESM6 [file 16787398]
