# Supplementary material for: Microwave ablation compared with hepatic resection for the treatment of hepatocellular carcinoma and liver metastases: a systematic review and meta-analysis
Source: Springer Nature journal article supplement (doi:10.1186/s12957-019-1632-6), 2019-06-10
Supplement: MOESM9 [file 16787398]

First author and year

RR (95% CI)

Events, Treatment

Events, Control

% Weight

Wang ZL 2008

0.84 (0.38, 1.85)

12/114

10/80

31.52

Li W 2017

1.25 (0.73, 2.14)

14/60

41/220

68.48

Overall (I-squared = 0.0%, p = 0.413)

1.10 (0.71, 1.72)

26/174

51/300

100.00

NOTE: Weights are from random effects analysis

.1

.5

1

2

10

Favors MWA

Favors HR
