# Supplementary material for: Microwave ablation compared with hepatic resection for the treatment of hepatocellular carcinoma and liver metastases: a systematic review and meta-analysis
Source: World J Surg Oncol. 2019 Jun 10;17:98. doi: 10.1186/s12957-019-1632-6 (PMC6558848; doi:10.1186/s12957-019-1632-6)
Supplement: Supplementary file 4 — Methodological quality assessment of observational studies using the NOS scale. Table of Newcastle–Ottawa scale assessments of the included observational studies. (XLSX 10 kb) [file 12957_2019_1632_MOESM4_ESM.xlsx]

## Sheet: Sheet1
Methodological quality assessment of observational studies using the NOS scale
Study	Representativeness of Exposed Cohort	Selection of the Non-Exposed Cohort	Ascertainment of Exposure	Demonstration that the outcome of interest was not present at the start of the study	Comparability of the cohorts on the basis of design or analysis	Assessment of outcome	Was the follow-up long enough for outcomes to occur?	Adequacy of follow-up of cohorts	Total†
Tanaka K, 2006	*		*	*	**	*	*	*	8
Wang ZL, 2008	*	*	*	*	**	*	*	*	9
Imura S, 2012	*	*	*	*	*	*	*		7
Stattner S, 2013	*	*	*	*	**	*	*	*	9
Takami Y, 2013	*		*	*	**	*	*	*	8
Shi J, 2014	*	*	*	*	**	*	*	*	9
Tan K, 2014	*	*	*	*	**	*		*	8
Zhang EL, 2016	*		*	*	**	*	*	*	8
Li W, 2017	*		*	*	*	*	*	*	7
Philips P, 2017	*		*	*	**	*	*	*	8
Ryu T, 2017	*		*	*	**	*	*	*	8
Song P, 2017	*	*	*	*	**	*	*	*	9
Zhang QB, 2017	*		*	*	**	*	*	*	8
Chen ZB, 2018	*	*	*	*	**	*	*	*	9
Chong CCN, 2018	*		*	*	**	*	*	*	8
†A total score of ≥8 indicates a high-quality observational study.
